# Supplementary material for: The mammalian trafficking chaperone protein UNC93B1 maintains the ER calcium sensor STIM1 in a dimeric state primed for translocation to the ER cortex
Source: PubMed Central journal article supplement (PMC8857484; doi:10.1016/j.jbc.2022.101607), 2022-01-20
Supplement: mmc1.pdf [file mmc1.pdf]

**The mammalian un-coordinated 93 homologue B1 maintains STIM1 in a dimeric state primed for translocation to cortical ER domains.**

Wen-An Wang & Nicolas Demaurex\*

**Supporting Information**

Figures and figure legends S1-S8

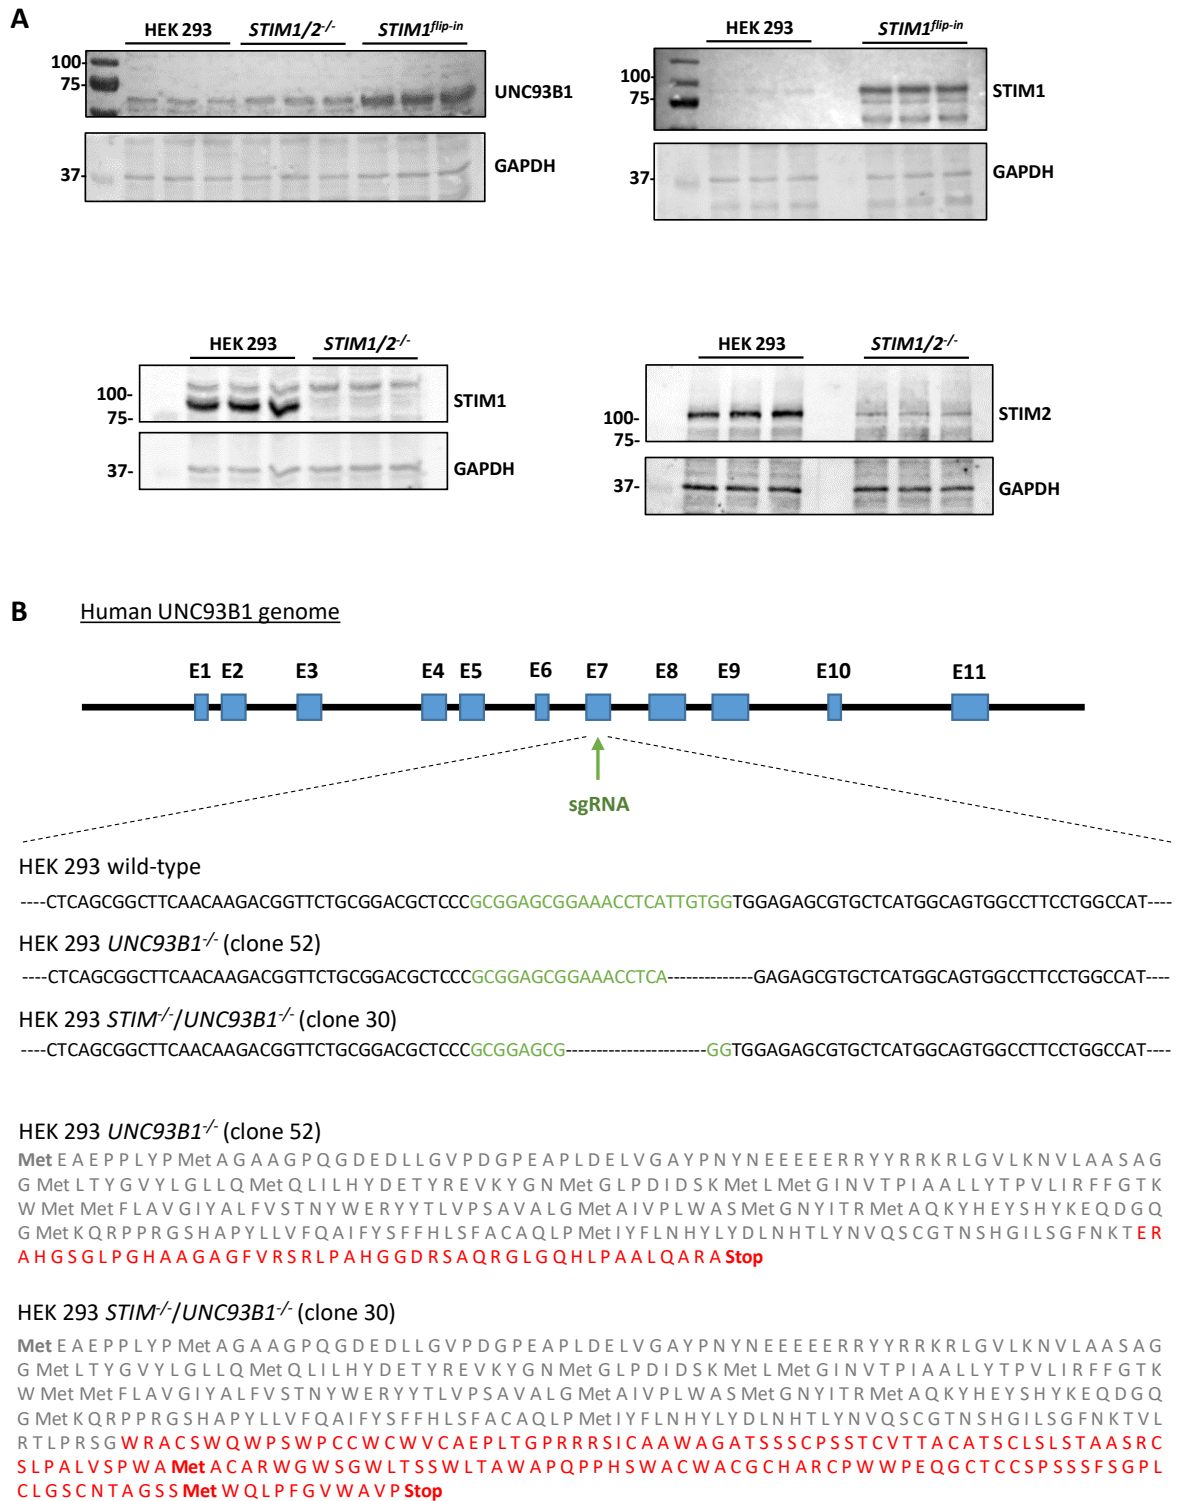

Figure S1

**Figure S1**

A. Western blot of protein lysates from WT, SKO and *STIM1<sup>flip-in</sup>* cells probed with  $\alpha$ STIM1,  $\alpha$ STIM2,  $\alpha$ UNC93B1 and  $\alpha$ GAPDH antibodies as indicated. B. Structure of the human *UNC93B1* gene with our sgRNA designed to target exon 7 (upper panel), sequencing results (middle panel) reveal base pair deletions within the sgRNA region translating in early stop codons within the amino acid sequence (in red, lower panel).

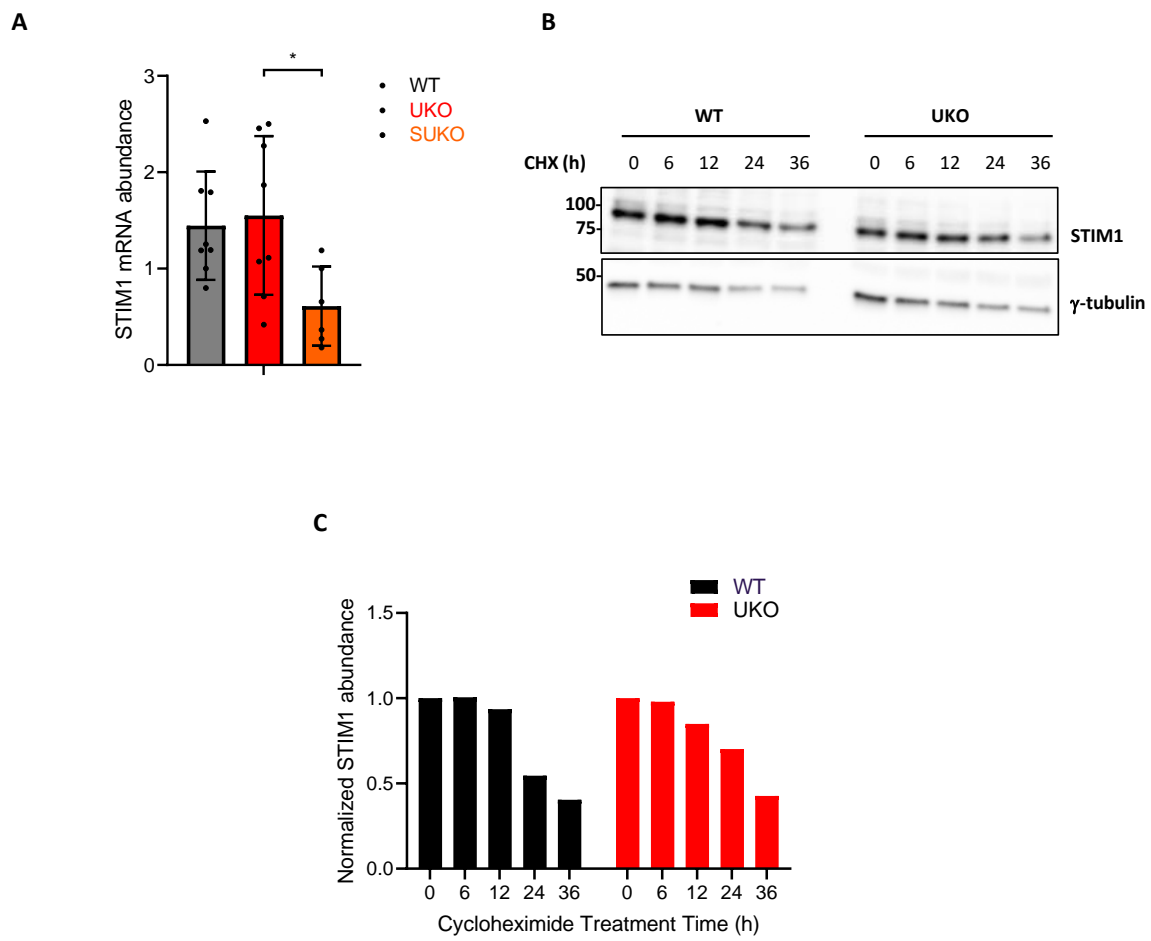

Figure S2

**Figure S2**

A. STIM1 mRNA levels assessed by qPCR in WT, UKO and SUKO cells. N=4, \*p<0.05, ordinary one-way ANOVA (F=4.241, P=0.0300). B. Western blot of protein lysates of WT and UKO cells treated with 30 µg/ml of cycloheximide (CHX) for 0, 6, 12, 24, 36 hours and probed with αSTIM1 and αγ-tubulin antibodies as indicated. C. Quantification of protein degradation in the western blots. Representative of 2 experiments.

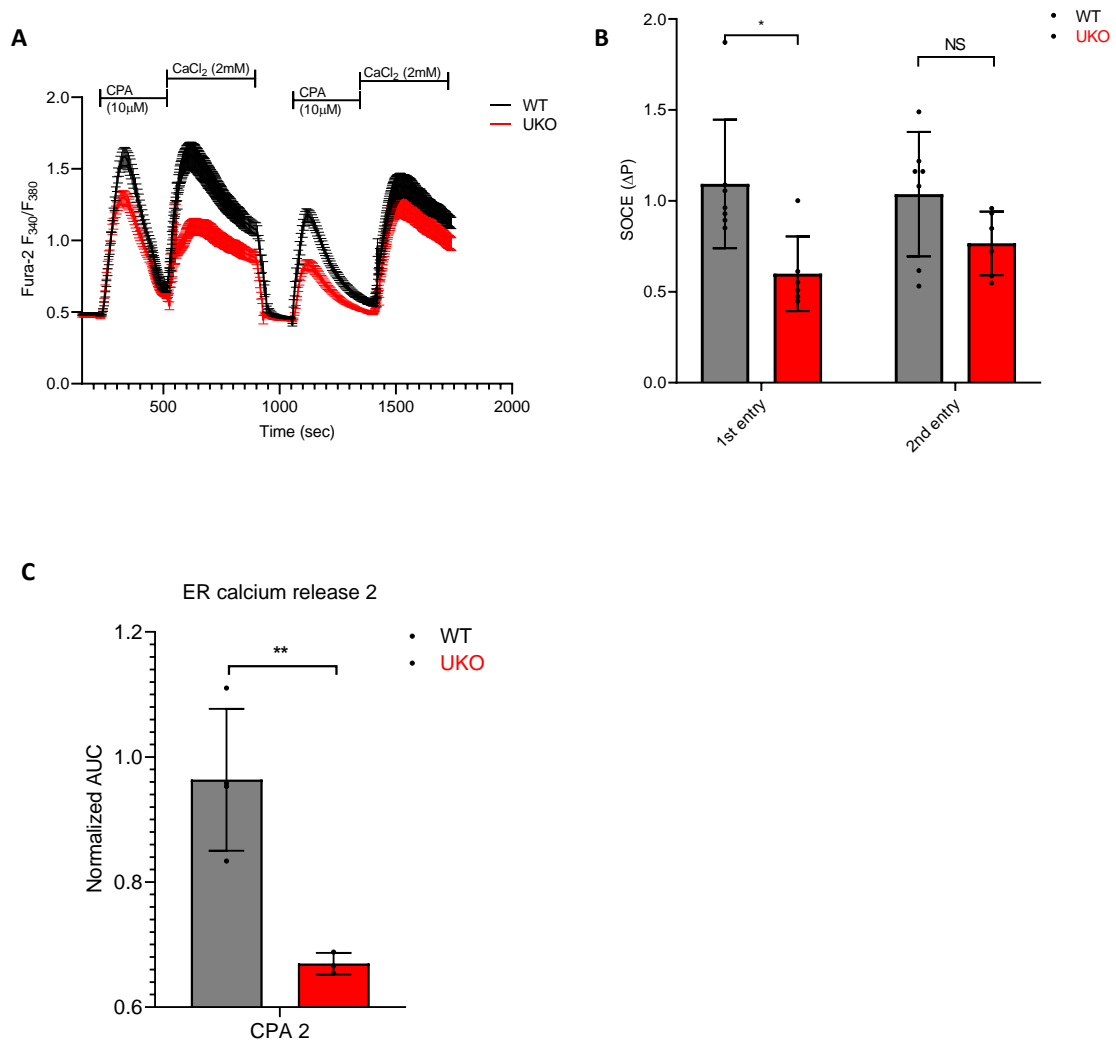

Figure S3

### Figure S3

A. Representative Fura-2AM recordings from WT and UKO cells during successive additions of 10  $\mu$ M cyclopiazonic acid (CPA) in  $\text{Ca}^{2+}$ -free medium followed by readmission of 2 mM  $\text{Ca}^{2+}$ . B. Peak amplitude of the two successive SOCE responses. Data are mean $\pm$ SD of 7 independent experiments. NS=non-significant; \* $p > 0.05$ , two-way ANOVA (Interaction:  $SS=0.08050$ ,  $DF=1$ ,  $MS=0.08050$ ,  $F(1,11)=2.132$ ,  $P=0.1722$ ). C. The ER  $\text{Ca}^{2+}$  mobilized after the second addition of CPA in  $\text{Ca}^{2+}$ -free medium as quantified with area under the curve (AUC). Data are mean $\pm$ SD of 7 independent experiments. NS=non-significant; \*\* $p > 0.01$ , unpaired t-test.

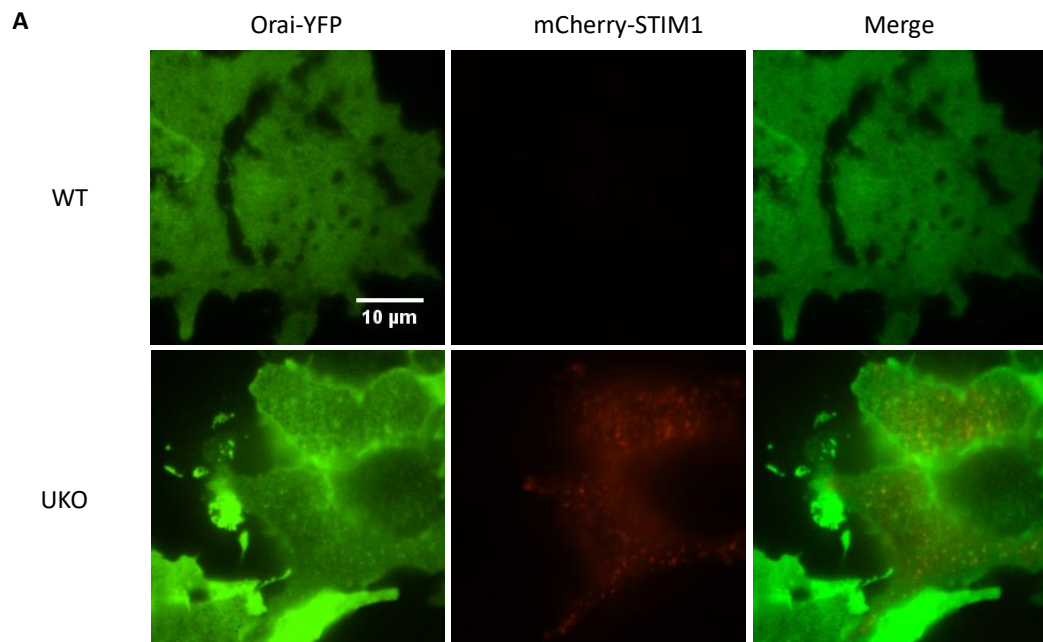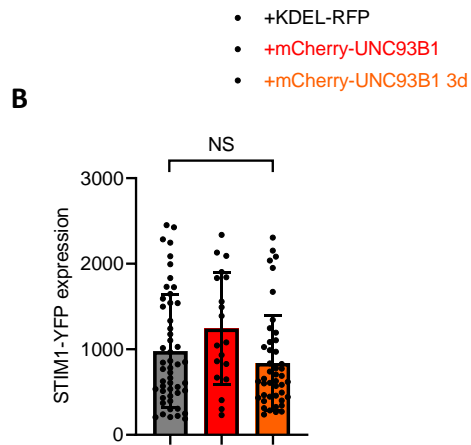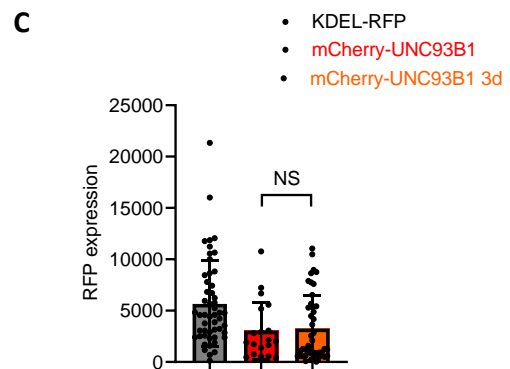

Figure S4



**Figure S4**

A. Corresponding representative TIRF images to Fig. 2C of WT and UKO cells expressing Orai1-YFP (green) and mCherry-STIM1 (red) at rest before TG treatment. B, C. Wide-field YFP (B) and RFP/mCherry (C) fluorescence levels of WT cells co-expressing YFP-STIM and RFP/mCherry constructs used for the TIRF experiments of Fig. 3. Data are mean $\pm$ SD of 26-69 cells from 4 independent experiments. NS=non-significant, ordinary one-way ANOVA (B.  $F=2.779$ ,  $P=0.664$ ) (C.  $F=6.458$ ,  $P=0.0022$ ).

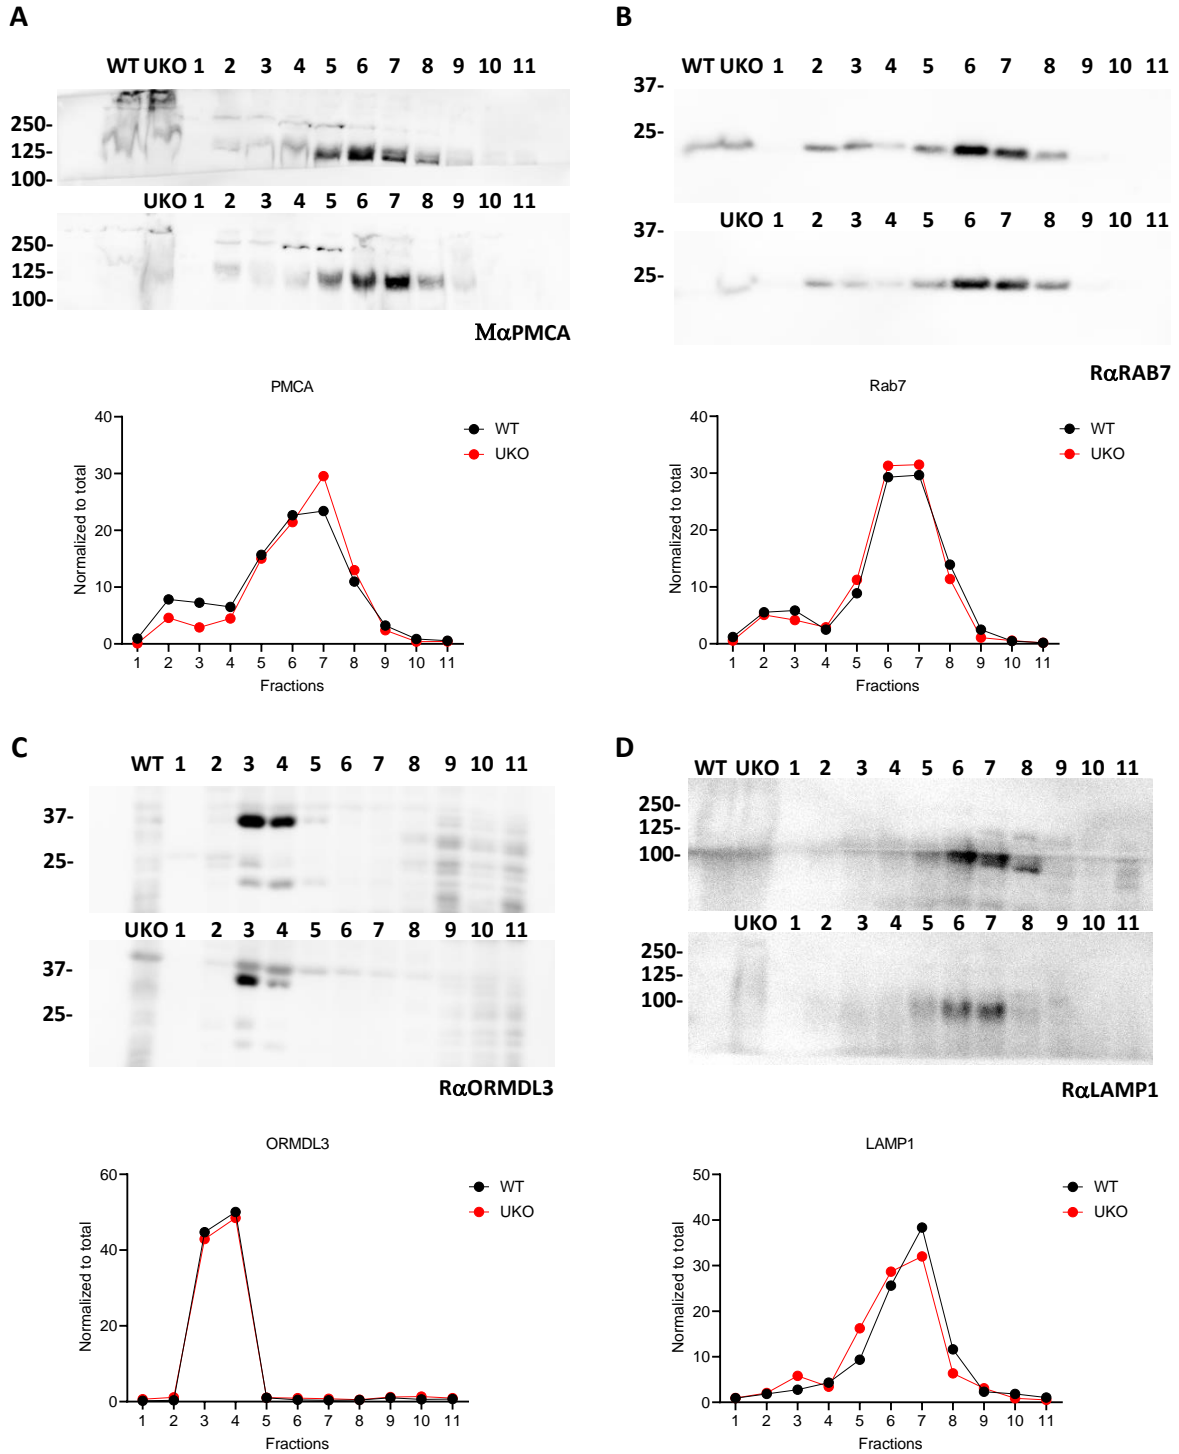

Figure S5

**Figure S5**

Immunoblot of protein lysates of WT (top) and UKO (bottom) cells, subjected to subcellular fractionation (1-11; light to heavy) through an iodixanol gradient (6%, 9%, 12%, 15%, 18%, 21%, 25%, and 27%). Blots were probed with  $\alpha$ PMCA (A),  $\alpha$ Rab7 (B),  $\alpha$ ORMDL3 (C) and  $\alpha$ LAMP1 (D) antibodies. Graphs show the quantification of the respective immunoreactivity through fractions 1 to 11. Representative of 2 biological experiments.

**A**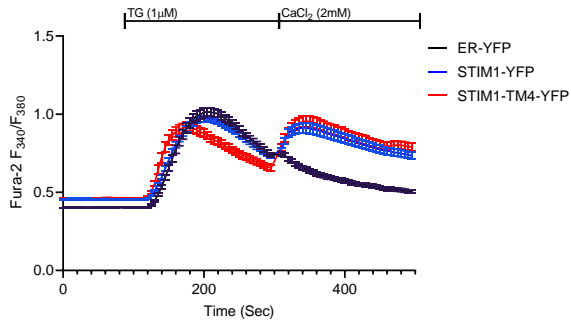**B**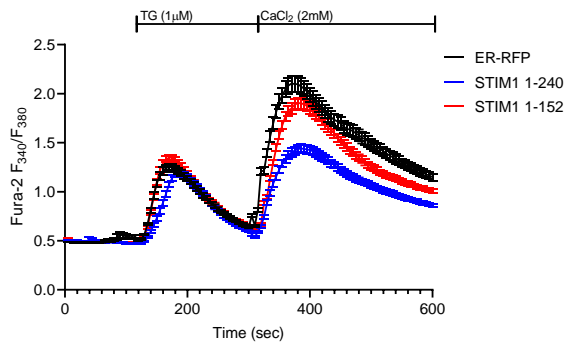**C**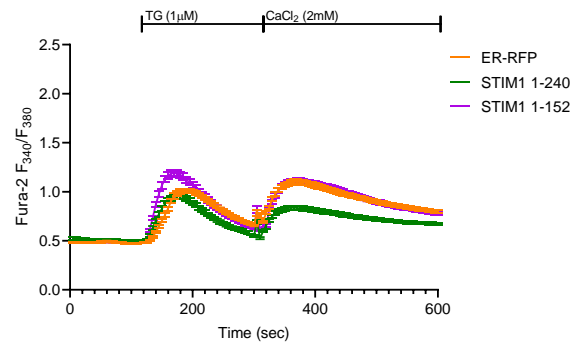**D**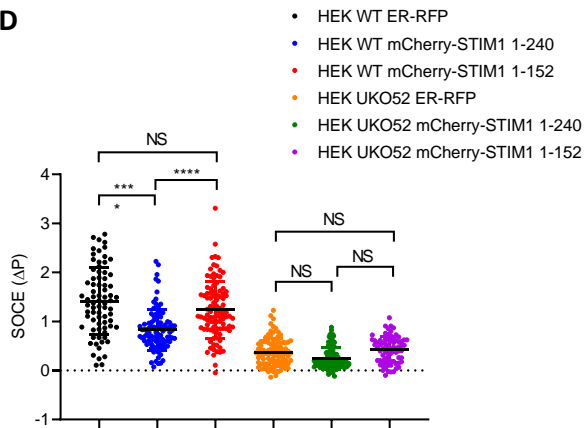**Figure S6**

**Figure S6**

Functional SOCE assessment of the STIM1-TM4, STIM1<sup>1-240</sup>, and STIM1<sup>1-152</sup> truncation constructs. A. Averaged Fura-2 responses evoked by Tg and subsequent Ca<sup>2+</sup> readmission to SKO cells expressing ER-YFP, STIM1-YFP or STIM1-TM4-YFP. B, C. Representative averaged Fura-2 responses evoked by Tg and subsequent Ca<sup>2+</sup> readmission to WT (B) and UKO cells (C) expressing ER-RFP, STIM1<sup>1-240</sup> or STIM1<sup>1-152</sup>. D. Peak amplitude of the SOCE responses in B-C. Data are mean±SD of 75-100 cells from 3 independent experiments. NS=non-significant, \*\*\*\*p>0.001, ordinary one-way ANOVA (F=112.6, P<0.0001).

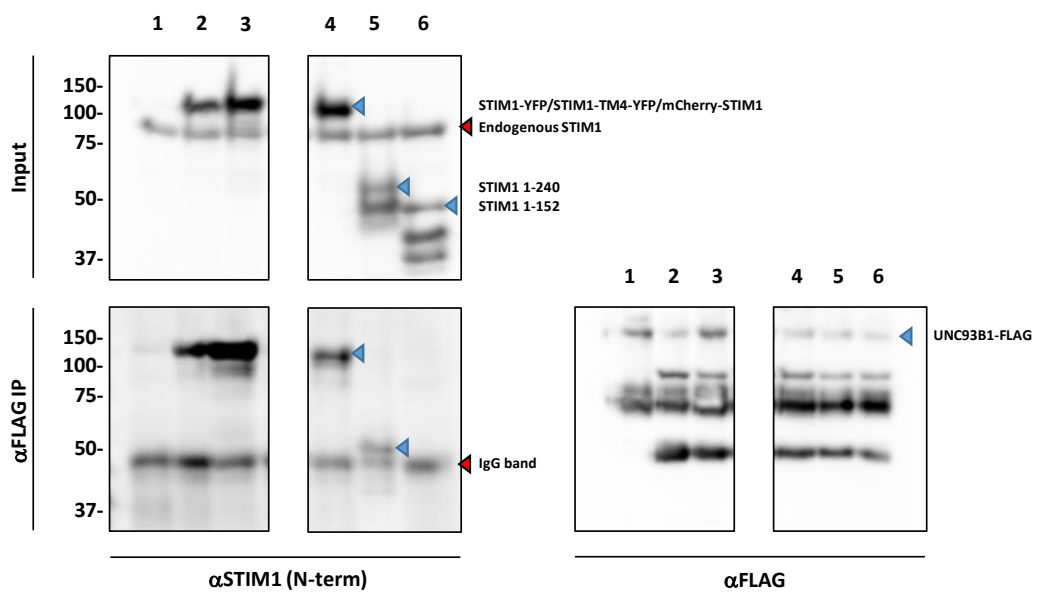

Figure S7

**Figure S7**

Immunoblot of input and immunoprecipitated (IP) protein lysates from WT cells expressing UNC93B1-FLAG with KDEL-GFP (1), STIM1-YFP (2), STIM1<sup>TM</sup>-YFP (3), mCherry-STIM1 (4), mCherry-STIM1<sup>1-240</sup> (5), or mCherry-STIM1<sup>1-152</sup> (6). UNC93B1 was immunoprecipitated with  $\alpha$ FLAG antibody and the blots were probed with  $\alpha$ STIM1 (N-term) and  $\alpha$ FLAG antibodies. The blue arrows indicate the locations of the expected products and the red arrows additional reactivities. Representative of 2 biological experiments.

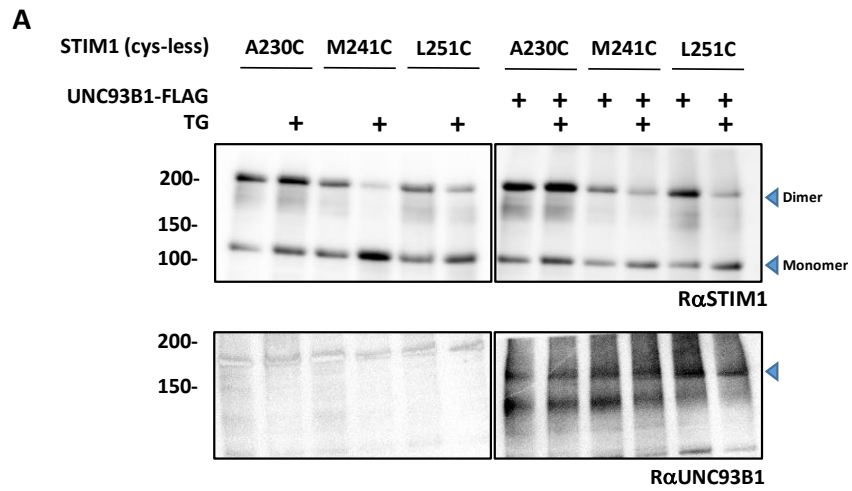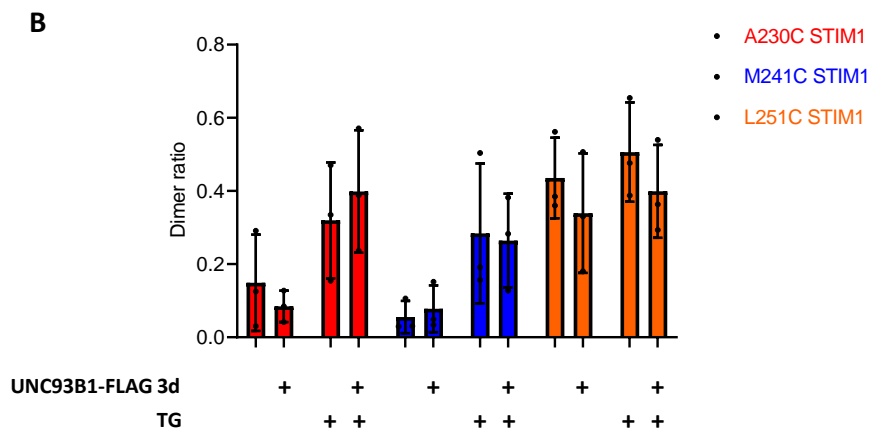

Figure S8



**Figure S8**

A. Immunoblot analysis of protein lysates from SUKO cells expressing the single cysteine STIM1 constructs with or without mCherry-UNC93B1-3d and treated or not with Tg (0.5  $\mu$ M for 5 min). Cells were subjected to *in-vivo* crosslinking with aldrithiol-4 and to electrophoresis under non-reducing conditions. Blots were probed with  $\alpha$ STIM1 and  $\alpha$ UNC93B1 antibodies. Representative of 3 independent experiments. B. Quantification of the STIM1 dimer ratio from the *in-vivo* crosslink immunoblots. Data are mean $\pm$ SD of 3 experiments. Non-significant where there is no indication, unpaired t-test.
